# Supplementary material for: Human atlastins are sufficient to drive the fusion of liposomes with a physiological lipid composition
Source: PubMed Central journal article supplement — J Cell Biol. 2023 Feb 9;222(4):e202109090. doi: 10.1083/jcb.202109090 (PMC9949273; doi:10.1083/jcb.202109090), 2023-02-09
Supplement: JCB_202109090_SourceDataF5.pdf [file JCB_202109090_SourceDataF5.pdf]

Input

IP myc

1 2 3 4 5

1 2 3 4 5

100  
80  
60  
40  
20  
0

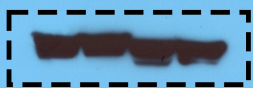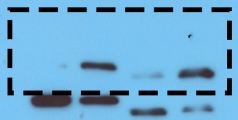

anti-GFP

100  
80  
60  
40  
20  
0

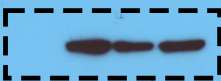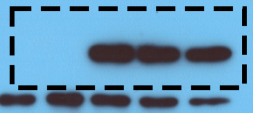

anti-myc

αmyc

1. N.C
  2. Atm-GFP
  3. Spastin-myc / GFP-Atm
  4. " / GFP-Atm CNT
  5. " / GFP-Atm OCT
- α-GFP

1. negative control
2. EGFP-ATL1
3. Spastin-myc & EGFP-ATL1
4. Spastin-myc & EGFP-ATL1(32-558)
5. Spastin-myc & EGFP-ATL1(1-520)
