# Supplementary material for: Human atlastins are sufficient to drive the fusion of liposomes with a physiological lipid composition
Source: PubMed Central journal article supplement — J Cell Biol. 2023 Feb 9;222(4):e202109090. doi: 10.1083/jcb.202109090 (PMC9949273; doi:10.1083/jcb.202109090), 2023-02-09

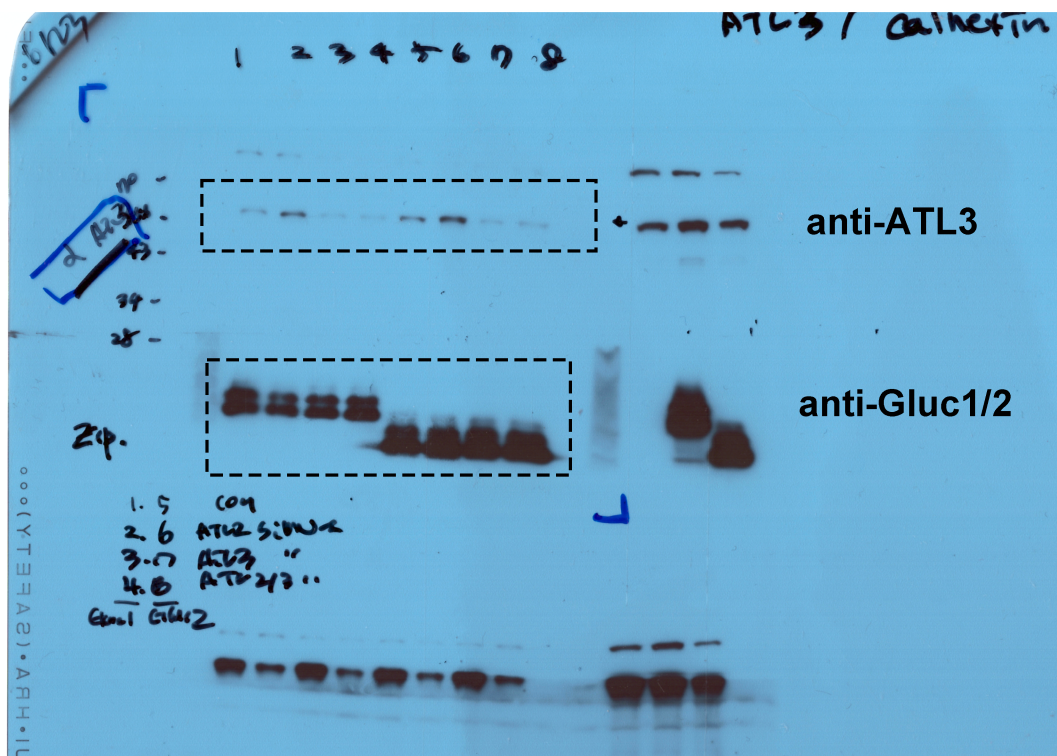

1. Gluc1 control siRNA
2. Gluc1 siATL2
3. Gluc1 siATL3
4. Gluc1 siATL2/siATL3
5. Gluc2 control siRNA
6. Gluc2 siATL2
7. Gluc2 siATL3
8. Gluc2 siATL2/siATL3

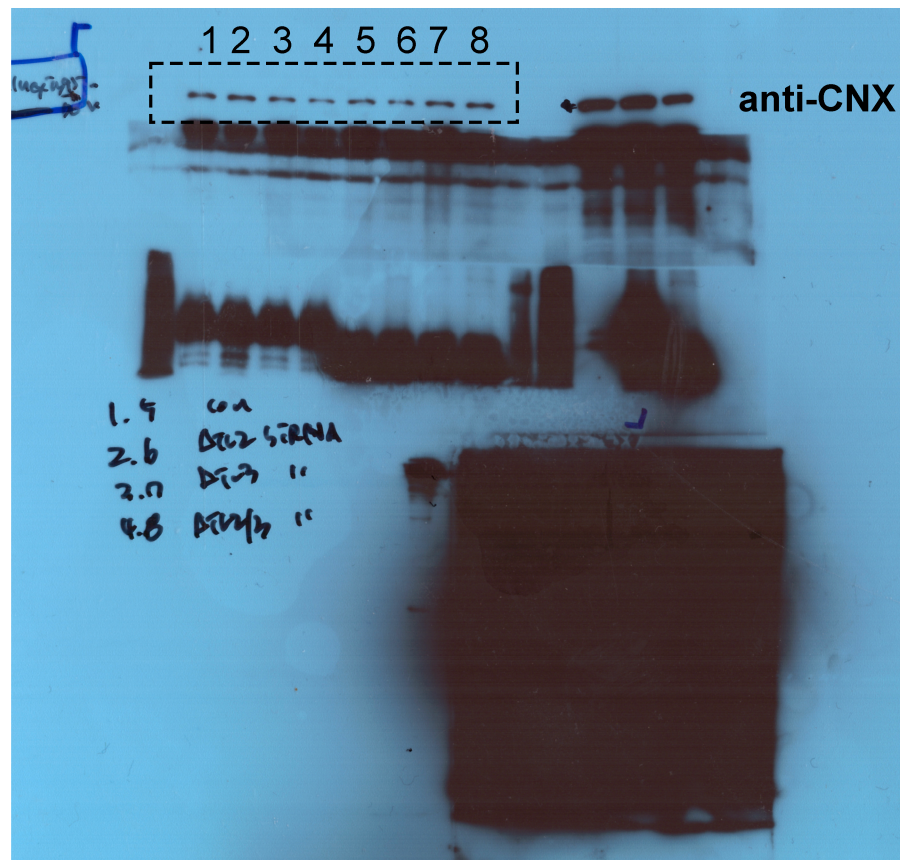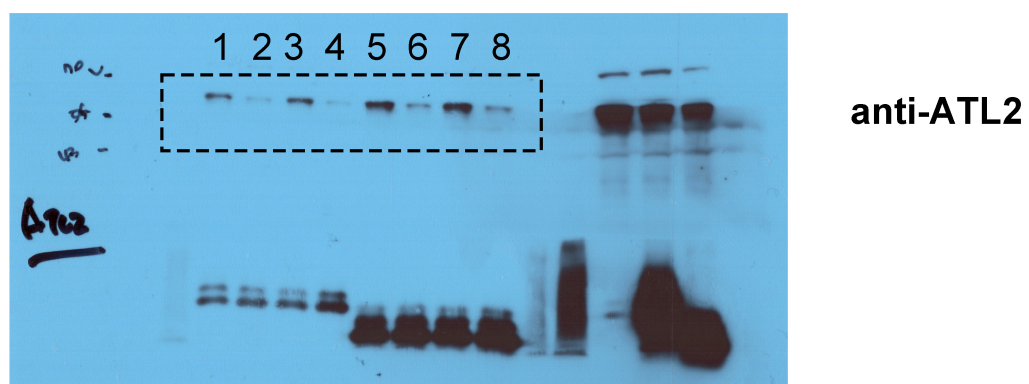

Supplement: JCB_202109090_SourceDataF8.pdf [file JCB_202109090_SourceDataF8.pdf]
