# Supplementary figures and images for: Human atlastins are sufficient to drive the fusion of liposomes with a physiological lipid composition
Source: PubMed Central journal article supplement — J Cell Biol. 2023 Feb 9;222(4):e202109090. doi: 10.1083/jcb.202109090 (PMC9949273; doi:10.1083/jcb.202109090), 2023-02-09

BJ3505 vsm20y1A

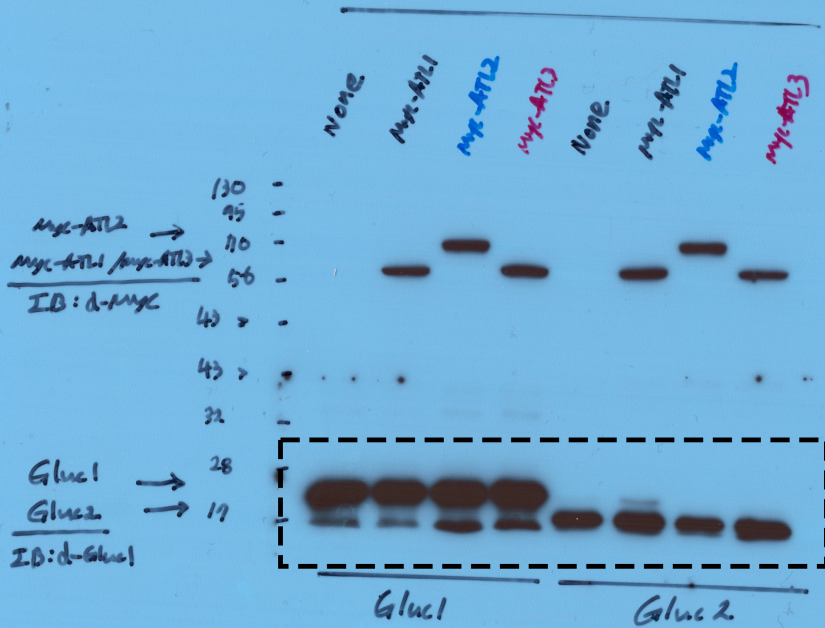

BJ3505 vsm20y1B

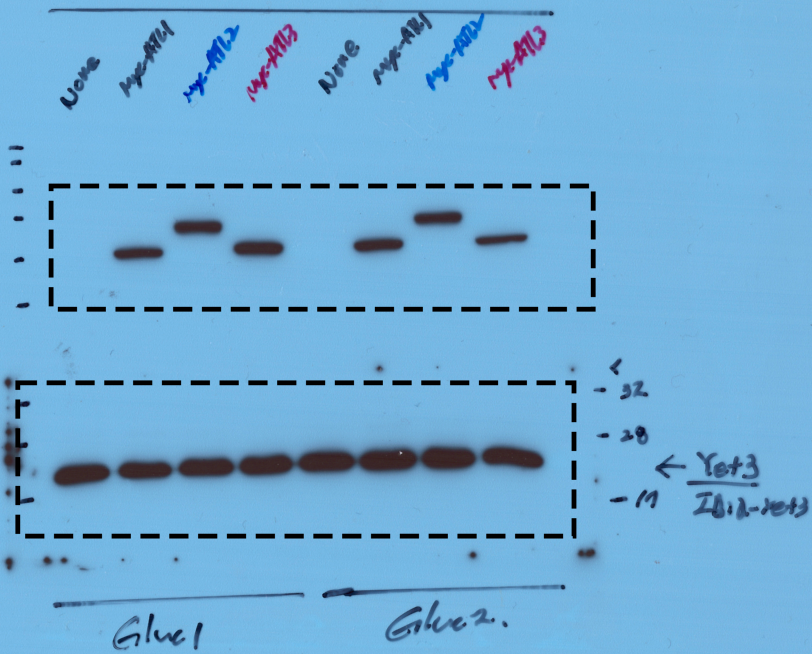

Supplement: JCB_202109090_SourceDataF2.pdf [file JCB_202109090_SourceDataF2.pdf]

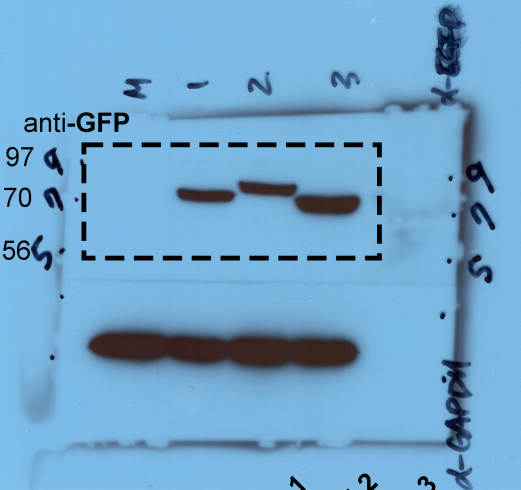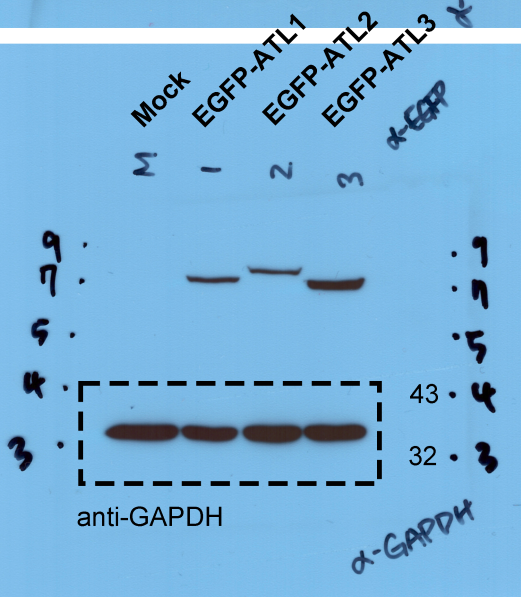

Supplement: JCB_202109090_SourceDataF3.pdf [file JCB_202109090_SourceDataF3.pdf]

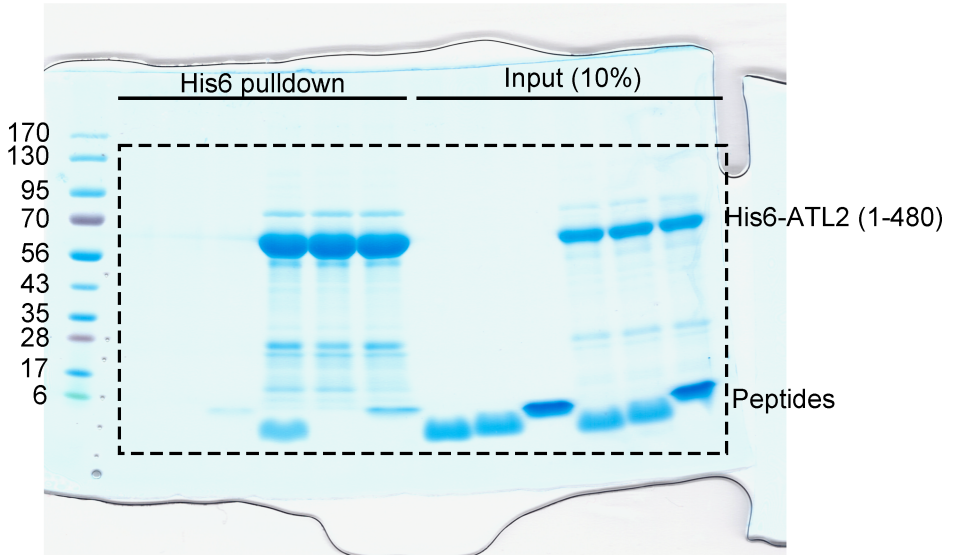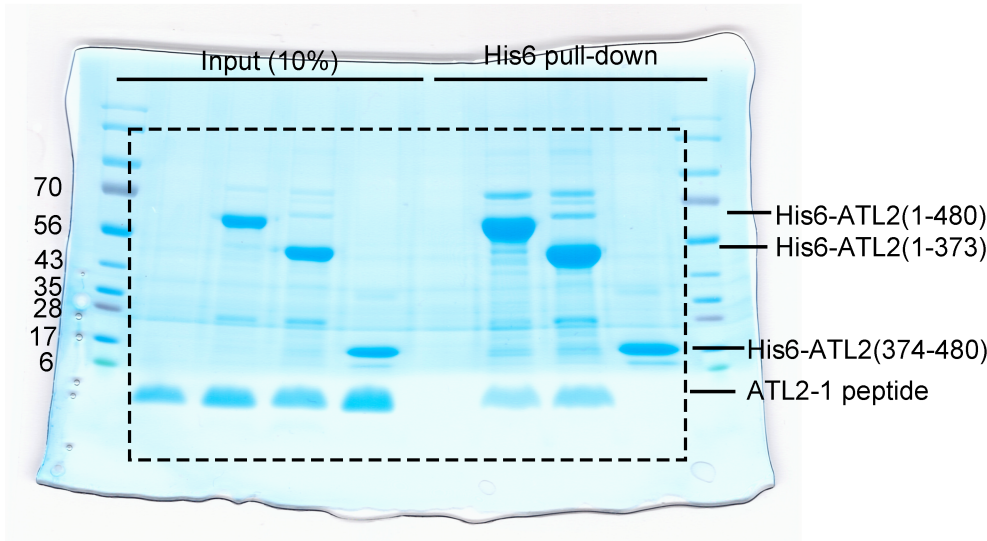

Supplement: JCB_202109090_SourceDataF7.pdf [file JCB_202109090_SourceDataF7.pdf]

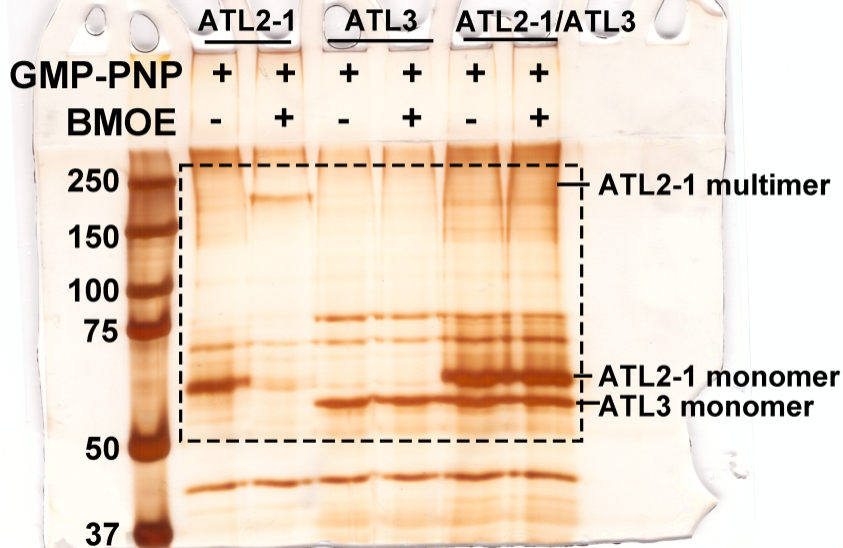

Supplement: JCB_202109090_SourceDataF9.pdf [file JCB_202109090_SourceDataF9.pdf]

**Top fraction**

**Bottom fraction**

ATL2-1  
ATL2-1 (KKE)  
ATL2-2

ATL2-1  
ATL2-1 (KKE)  
ATL2-2

70  
56  
28  
17  
6

peptides

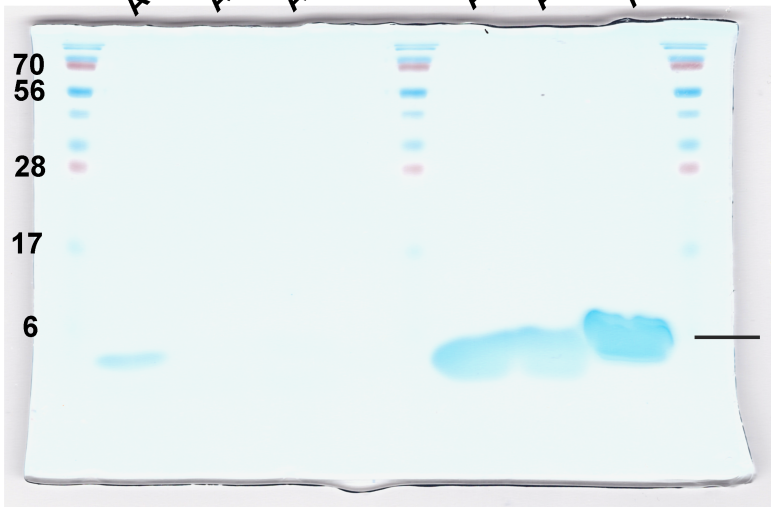

Supplement: JCB_202109090_SourceDataFS4.pdf [file JCB_202109090_SourceDataFS4.pdf]

**Input (20%)    His6 pulldown**

|   |   |   |   |   |
|---|---|---|---|---|
| + | + | + | + | + |
| - | + | - | + | + |
| + | - | + | - | - |
| - | - | + | + | - |
| - | - | - | - | + |

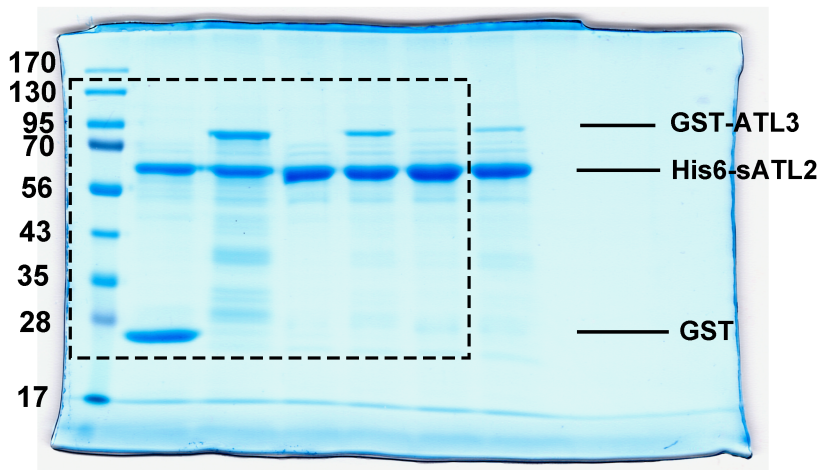

Supplement: JCB_202109090_SourceDataFS6.pdf [file JCB_202109090_SourceDataFS6.pdf]
